# Supplementary material
Source: HighWire-hosted journal article supplement (https://www.eneuro.org/content/5/4/ENEURO.0146-18.2018)

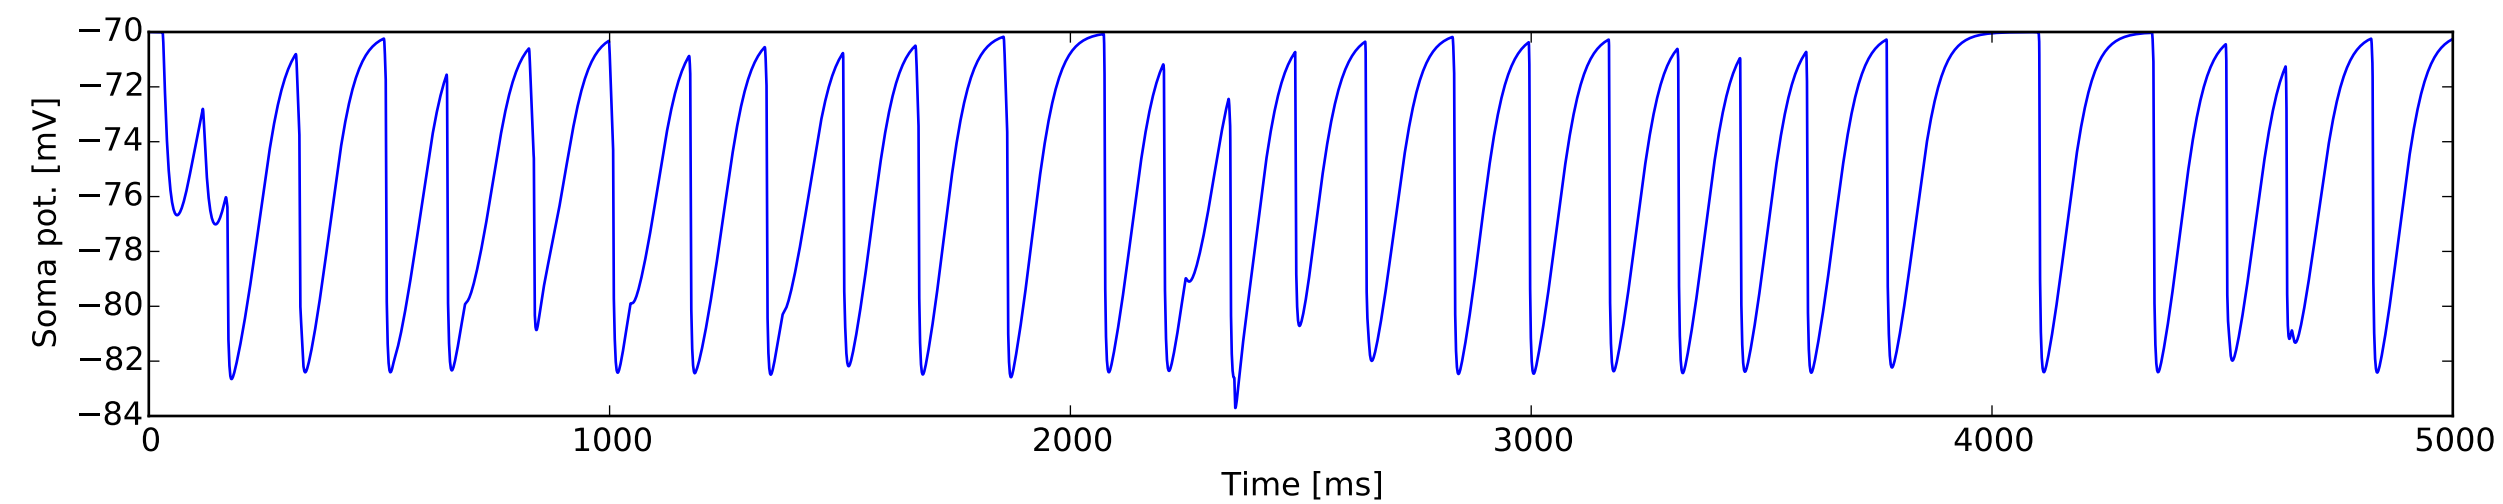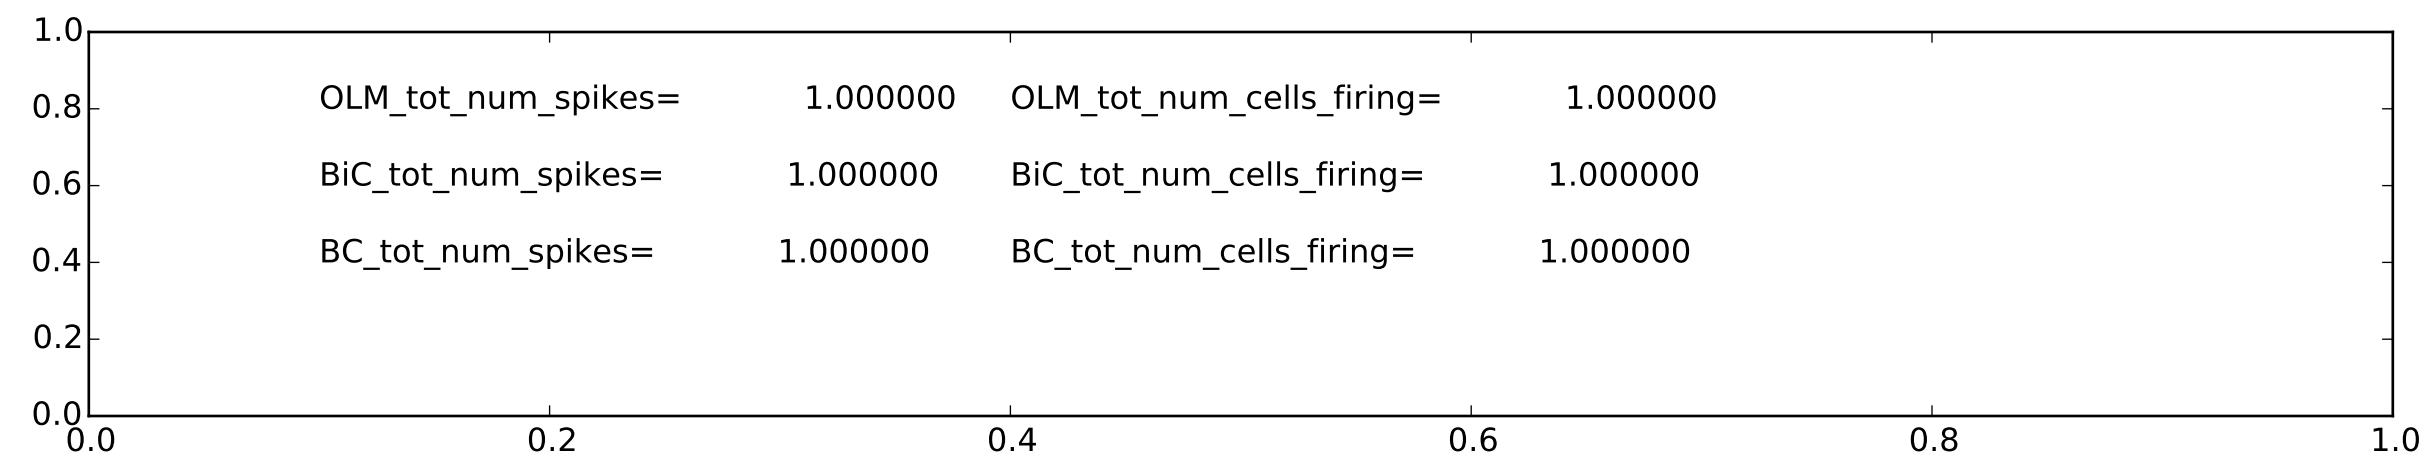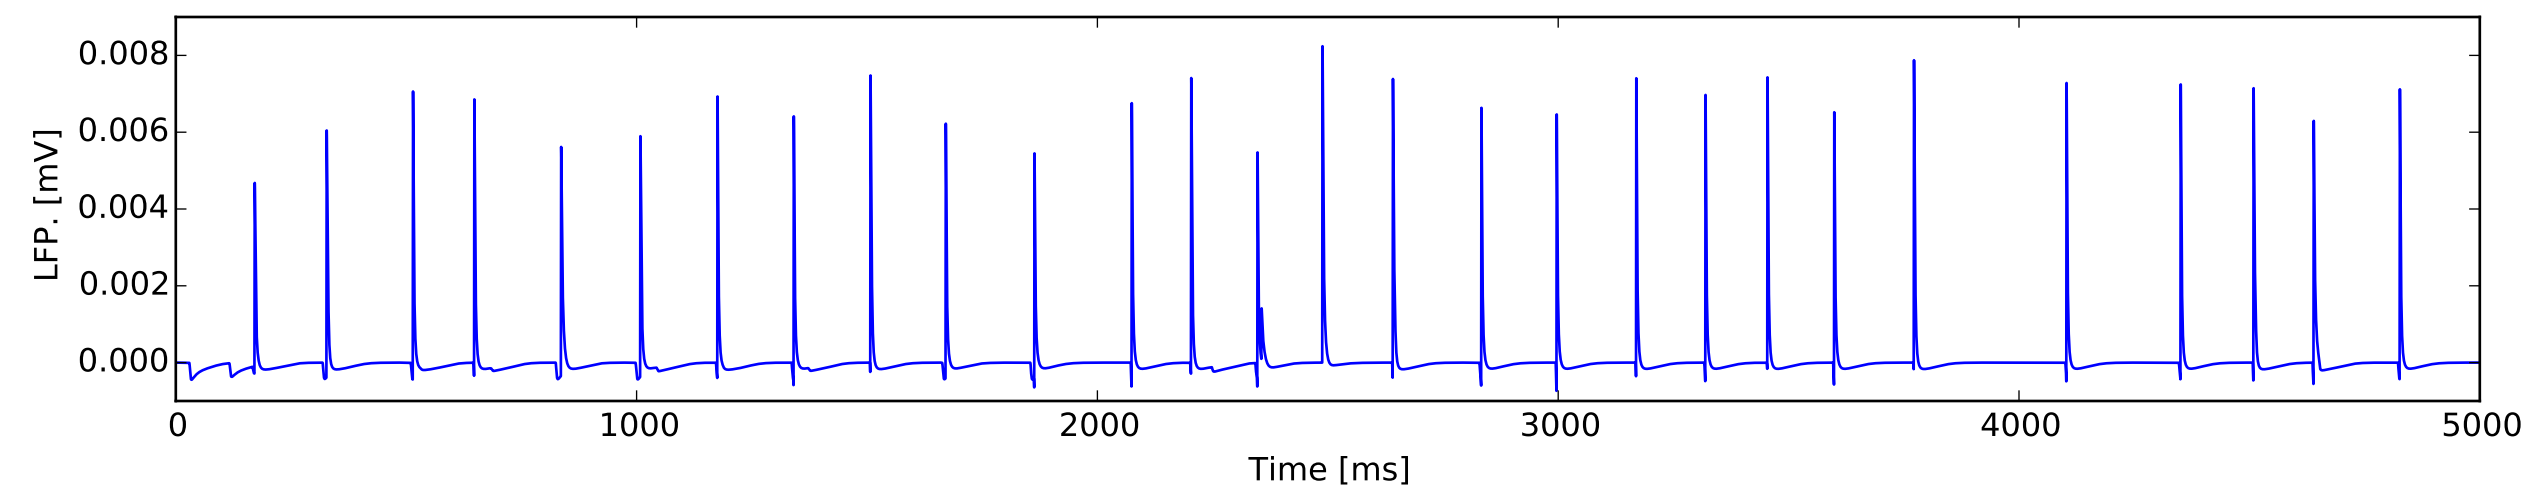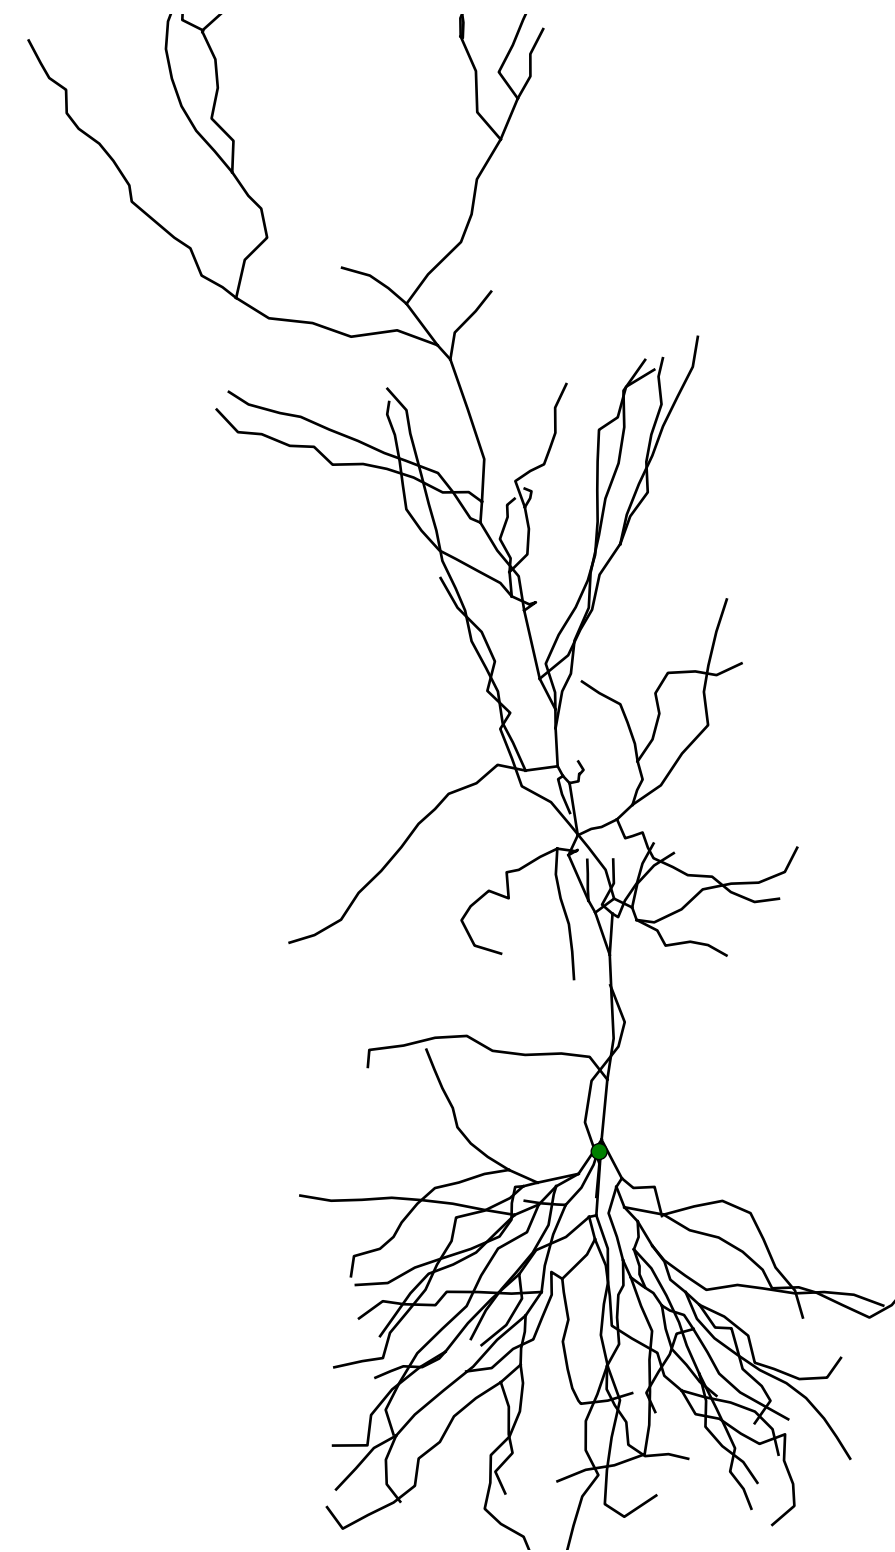

Supplement: inline-supplementary-material-2 [file inline-supplementary-material-2.gz]
